# Supplementary material for: Association between antihypertensive combinations and postoperative mortality and functional decline: a nationwide survey of Japanese adults undergoing major surgeries
Source: bioRxiv or medRxiv preprint supplement (doi:10.1101/2024.03.14.24304265), 2024-03-16
Supplement: Supplementary file [file media-1.pdf]

**Association between antihypertensive combinations and postoperative mortality and functional decline: a nationwide survey of Japanese adults undergoing major surgeries**

Rena Suzukawa<sup>1</sup>, Shintaro Mandai<sup>1\*</sup>, M.D., Ph.D., Yuta Nakano<sup>1</sup>, M.D., Shunsuke Inaba<sup>1</sup>, M.D., Hisazumi Matsuki<sup>1</sup>, M.D., Yutaro Mori<sup>1</sup>, M.D., Ph.D., Fumiaki Ando<sup>1</sup>, M.D., Ph.D., Takayasu Mori<sup>1</sup>, M.D., Ph.D., Koichiro Susa<sup>1</sup>, M.D., Ph.D., Soichiro Iimori<sup>1</sup>, M.D., Ph.D., Shotaro Naito<sup>1</sup>, M.D., Ph.D., Eisei Sohara<sup>1</sup>, M.D., Ph. D., Tatemitsu Rai<sup>2</sup>, M.D., Ph. D., Kiyohide Fushimi<sup>3</sup>, M.D., Ph.D., Shinichi Uchida<sup>1</sup>, M.D., Ph.D.

<sup>1</sup>Department of Nephrology, Graduate School of Medical and Dental Sciences, Tokyo Medical and Dental University, 1-5-45 Yushima, Bunkyo, Tokyo 113-8519, Japan

<sup>2</sup>Department of Nephrology and Hypertension, Dokkyo Medical University, 880 Kitakobayashi, Mibu, Shimotsuga, Tochigi, 321-0293, Japan

<sup>3</sup>Department of Health Policy and Informatics, Graduate School of Medical and Dental Sciences, Tokyo Medical and Dental University, 1-5-45 Yushima, Bunkyo, Tokyo 113-8519, Japan

Suzukawa R and Mandai S contributed equally.

\* Corresponding Author

E-mail: smandai.kid@tmd.ac.jp (SM)

**Figure S1. Patient flowchart.**

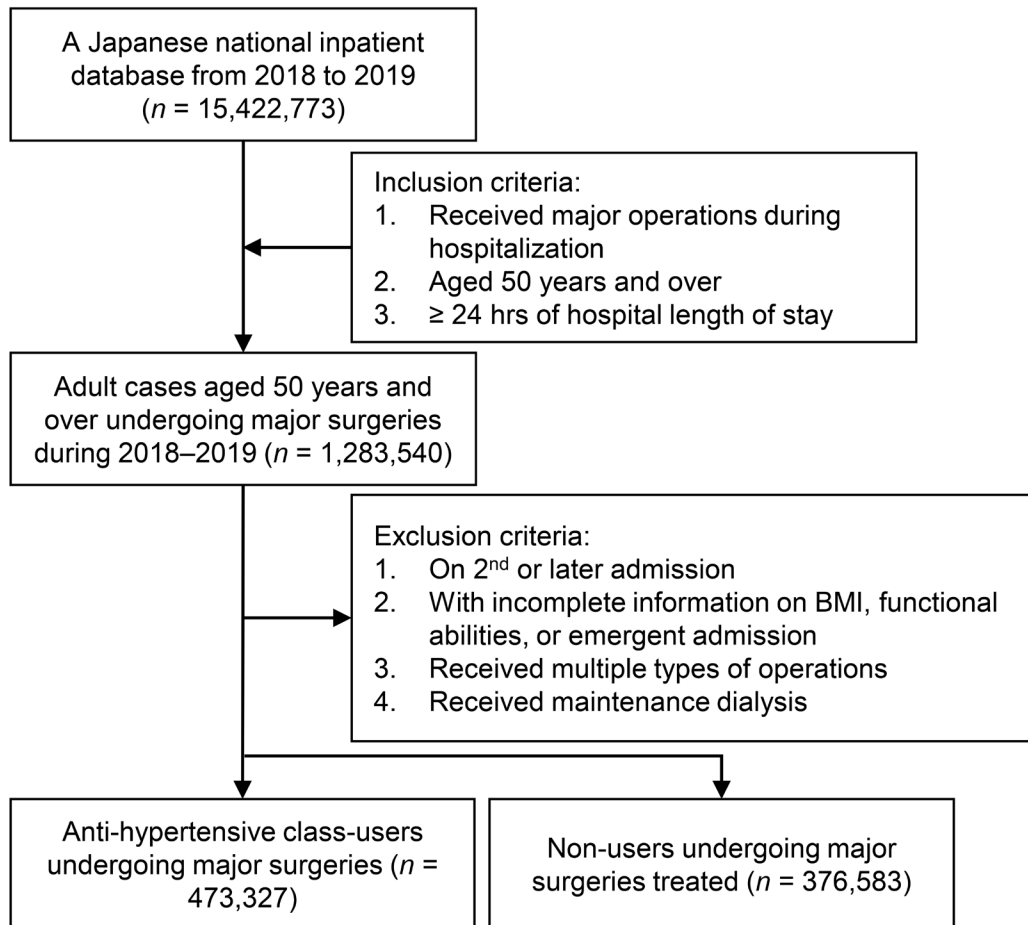

**Table S1. Combinations of antihypertensive classes and perioperative outcomes following major surgeries in Japanese adults.**

|                                | Composite outcome |                | Death            |                | Functional decline |         |
|--------------------------------|-------------------|----------------|------------------|----------------|--------------------|---------|
|                                | OR (95%CI)        | <i>P</i> value | OR (95%CI)       | <i>P</i> value | OR (95%CI)         |         |
| <u>One class</u>               |                   |                |                  |                |                    |         |
| Loop diuretic user vs. nonuser | 2.06 (1.98–2.15)  | <0.001         | 5.68 (5.17–6.23) | < 0.001        | 1.56 (1.49–1.64)   | < 0.001 |
| <u>Two classes</u>             |                   |                |                  |                |                    |         |
| Loop diuretic user vs. nonuser | 1.90 (1.82–1.98)  | <0.001         | 5.60 (5.00–6.29) | <0.001         | 1.51 (1.44–1.59)   | < 0.001 |
| <u>Three classes</u>           |                   |                |                  |                |                    |         |
| Loop diuretic user vs. nonuser | 1.77 (1.66–1.88)  | <0.001         | 6.13 (5.16–7.28) | <0.001         | 1.35 (1.26–1.45)   | < 0.001 |
| <u>≥Four classes</u>           |                   |                |                  |                |                    |         |
| Loop diuretic user vs. nonuser | 1.84 (1.63–2.07)  | <0.001         | 6.55 (4.58–9.36) | <0.001         | 1.42 (1.24–1.63)   | <0.001  |

Multivariate logistic regression models adjusted for age, sex, type of major surgeries (CABG, thoracic lobectomy, orthopedic surgery, hepatopancreatobiliary surgery, gastrointestinal resection, and urological surgery), BMI, Barthel Index score on admission, DM, CVD, CKD, emergency admission, and admission year, and antihypertensive combinations. CABG, coronary artery bypass grafting; BMI, body mass index; DM, diabetes mellitus; CVD, cardiovascular disease; CKD, chronic kidney disease; CI, confidence interval; OR, odds ratio.
